# Supplementary material for: Transcriptomic and Proteomic Insights into the Effect of Sterigmatocystin on Aspergillus flavus
Source: MDPI journal article supplement (doi:10.3390/jof9121193), 2023-12-13
Supplement: s1 [file s1]

# Transcriptomic and Proteomic Analysis of *Aspergillus flavus* Response to Sterigmatocystin

**Table S1.** Proportions of genes with different expression levels.

| Samples | FPKM Interval |     |      |       |     |
|---------|---------------|-----|------|-------|-----|
|         | 0~1           | 1~3 | 3~15 | 15~60 | >60 |
| CK_1    | 233           | 399 | 1041 | 833   | 872 |
| CK_2    | 220           | 407 | 1032 | 818   | 853 |
| CK_4    | 251           | 423 | 1048 | 829   | 788 |
| TJ_1    | 697           | 489 | 722  | 637   | 614 |
| TJ_2    | 754           | 463 | 728  | 655   | 587 |
| TJ_4    | 594           | 473 | 753  | 673   | 684 |

**Table S2.** GO functional enrichment analysis of differentially expressed genes.

| GO ID      | Number | Pop<br>number | P<br>value_uncorrected | FDR | Description                                                                                                                             |
|------------|--------|---------------|------------------------|-----|-----------------------------------------------------------------------------------------------------------------------------------------|
| <b>MF</b>  |        |               |                        |     |                                                                                                                                         |
| GO:0016491 | 548    | 1573          | 4.81297E-10            | 0   | Oxidoreductase activity                                                                                                                 |
| GO:0003824 | 1480   | 5098          | 6.51185E-10            | 0   | catalytic activity<br>oxidoreductase activity,<br>acting on paired donors,<br>with incorporation or<br>reduction of molecular<br>oxygen |
| GO:0016705 | 119    | 287           | 9.20882E-09            | 0   | structural constituent of<br>ribosome                                                                                                   |
| GO:0003735 | 6      | 113           | 1.43745E-08            | 0   | monooxygenase activity                                                                                                                  |
| GO:0004497 | 119    | 291           | 1.88615E-08            | 0   |                                                                                                                                         |
| <b>BP</b>  |        |               |                        |     |                                                                                                                                         |
| GO:0071840 | 53     | 413           | 2.58209E-10            | 0   | cellular component<br>organization or biogenesis                                                                                        |
| GO:0055114 | 543    | 1538          | 4.10448E-10            | 0   | oxidation-reduction<br>process                                                                                                          |
| GO:0044710 | 918    | 2926          | 5.87454E-10            | 0   | single-organism metabolic<br>process                                                                                                    |
| GO:0044699 | 1217   | 4145          | 6.47599E-10            | 0   | single-organism process                                                                                                                 |
| GO:0044267 | 76     | 504           | 1.37828E-09            | 0   | cellular protein metabolic<br>process                                                                                                   |
| <b>CC</b>  |        |               |                        |     |                                                                                                                                         |
| GO:0044446 | 98     | 667           | 3.2679E-10             | 0   | intracellular organelle part                                                                                                            |
| GO:0044422 | 98     | 672           | 3.71546E-10            | 0   | organelle part                                                                                                                          |
| GO:0032991 | 168    | 996           | 4.08468E-10            | 0   | macromolecular complex                                                                                                                  |
| GO:0044424 | 456    | 2232          | 5.59664E-10            | 0   | intracellular part                                                                                                                      |
| GO:0044464 | 538    | 2507          | 9.22963E-10            | 0   | cell part                                                                                                                               |

Note: FDR: P-value corrected.

**Table S3.** Top 10 KEGG enrichments for up and downregulated genes.

| Ko id                      | Term                                    | Number | P value_uncorrected |
|----------------------------|-----------------------------------------|--------|---------------------|
| <b>Downregulated genes</b> |                                         |        |                     |
| map00254                   | Aflatoxin biosynthesis                  | 13     | 0.000               |
| map00500                   | Starch and sucrose metabolism           | 20     | 0.001               |
| map00350                   | Tyrosine metabolism                     | 18     | 0.001               |
| map00650                   | Butanoate metabolism                    | 12     | 0.001               |
| map00380                   | Tryptophan metabolism                   | 15     | 0.002               |
| map00071                   | Fatty acid degradation                  | 12     | 0.005               |
| map02010                   | ABC transporters                        | 5      | 0.006               |
| map04213                   | Longevity regulating pathway - multiple | 8      | 0.007               |
| map00591                   | Linoleic acid metabolism                | 3      | 0.011               |
| map00061                   | Fatty acid biosynthesis                 | 7      | 0.012               |
| <b>Upregulated genes</b>   |                                         |        |                     |
| map00290                   | Valine, leucine and isoleucine          | 14     | 0.000               |
| map00250                   | Alanine, aspartate and glutamate        | 16     | 0.000               |
| map04113                   | Meiosis – yeast                         | 18     | 0.000               |
| map00770                   | Pantothenate and CoA biosynthesis       | 11     | 0.000               |
| map00970                   | Aminoacyl-tRNA biosynthesis             | 15     | 0.000               |
| map00670                   | One carbon pool by folate               | 8      | 0.000               |
| map00300                   | Lysine biosynthesis                     | 8      | 0.001               |
| map03008                   | Ribosome biogenesis in eukaryotes       | 18     | 0.001               |
| map00230                   | Purine metabolism                       | 23     | 0.002               |
| map00260                   | Glycine, serine, and threonine          | 18     | 0.003               |

**Table S4.** Protein Information for the six samples

| Samples | Concentration (mg/mL) | total amount (mg) |
|---------|-----------------------|-------------------|
| TJ-3    | 5.588                 | 0.950             |
| TJ-5    | 6.207                 | 1.055             |
| TJ-6    | 5.313                 | 0.903             |
| CK-3    | 4.434                 | 0.754             |
| CK-5    | 6.750                 | 1.148             |
| CK-6    | 6.457                 | 1.098             |

**Table S5.** Sixty-seven KEGG pathways associated with differentially expressed proteins

| Pathway                                     | Protein number | Background protein number | P value     |
|---------------------------------------------|----------------|---------------------------|-------------|
| <b>Metabolism</b>                           |                |                           |             |
| Aflatoxin biosynthesis                      | 7              | 12                        | 1.37E-05    |
| Glycolysis / Gluconeogenesis                | 11             | 34                        | 4.44E-05    |
| Glutathione metabolism                      | 9              | 24                        | 6.29E-05    |
| Carbon metabolism                           | 18             | 84                        | 7.60E-05    |
| Glyoxylate and dicarboxylate metabolism     | 10             | 31                        | 0.000103216 |
| Tryptophan metabolism                       | 7              | 19                        | 0.000486853 |
| Starch and sucrose metabolism               | 7              | 20                        | 0.000688923 |
| Methane metabolism                          | 6              | 18                        | 0.002213504 |
| Fructose and mannose metabolism             | 6              | 21                        | 0.005020163 |
| Biosynthesis of antibiotics                 | 24             | 186                       | 0.008248332 |
| Valine, leucine, and isoleucine degradation | 6              | 25                        | 0.011668305 |
| Oxidative phosphorylation                   | 1              | 64                        | 0.018098524 |
| Ascorbate and aldarate metabolism           | 2              | 3                         | 0.019685684 |
| Ether lipid metabolism                      | 2              | 4                         | 0.036084654 |
| Fatty acid degradation                      | 4              | 17                        | 0.038473425 |
| Pyruvate metabolism                         | 6              | 35                        | 0.045518011 |
| Pantothenate and CoA biosynthesis           | 3              | 11                        | 0.049321427 |
| Histidine metabolism                        | 3              | 11                        | 0.049321427 |
| Glycerophospholipid metabolism              | 4              | 19                        | 0.05271297  |
| Glycine, serine, and threonine metabolism   | 5              | 28                        | 0.055717632 |
| Inositol phosphate metabolism               | 3              | 12                        | 0.060291444 |
| Thiamine metabolism                         | 3              | 12                        | 0.060291444 |
| Nitrogen metabolism                         | 3              | 12                        | 0.060291444 |
| Pentose and glucuronate interconversions    | 3              | 13                        | 0.071853089 |
| beta-Alanine metabolism                     | 3              | 14                        | 0.083828604 |
| Biosynthesis of amino acids                 | 8              | 103                       | 0.145793378 |

|                                                        |   |    |             |
|--------------------------------------------------------|---|----|-------------|
| Pentose phosphate pathway                              | 3 | 20 | 0.15549855  |
| Glycosylphosphatidylinositol (GPI)-anchor biosynthesis | 1 | 2  | 0.155708289 |
| Glycerolipid metabolism                                | 2 | 11 | 0.179287714 |
| One carbon pool by folate                              | 2 | 12 | 0.197057823 |
| Phenylalanine metabolism                               | 2 | 12 | 0.197057823 |
| Valine, leucine, and isoleucine biosynthesis           | 2 | 13 | 0.213290221 |
| Arachidonic acid metabolism                            | 1 | 3  | 0.21387675  |
| alpha-Linolenic acid metabolism                        | 1 | 3  | 0.21387675  |
| Alanine, aspartate, and glutamate metabolism           | 1 | 27 | 0.226971283 |
| Lysine degradation                                     | 2 | 14 | 0.227881441 |
| Cysteine and methionine metabolism                     | 3 | 34 | 0.237720437 |
| Pyrimidine metabolism                                  | 2 | 33 | 0.244638617 |
| 2-Oxocarboxylic acid metabolism                        | 2 | 33 | 0.244638617 |
| Amino sugar and nucleotide sugar metabolism            | 1 | 25 | 0.25160071  |
| Tyrosine metabolism                                    | 2 | 16 | 0.251956094 |
| Biotin metabolism                                      | 1 | 4  | 0.261112564 |
| Arginine and proline metabolism                        | 2 | 18 | 0.269258125 |
| Citrate cycle (TCA cycle)                              | 1 | 22 | 0.28984601  |
| Ubiquinone and other terpenoid-quinone biosynthesis    | 1 | 5  | 0.298832651 |
| Cyanoamino acid metabolism                             | 1 | 5  | 0.298832651 |
| Fatty acid metabolism                                  | 1 | 20 | 0.315191469 |
| Vitamin B6 metabolism                                  | 1 | 6  | 0.328295025 |
| Arginine biosynthesis                                  | 1 | 17 | 0.350284875 |
| Selenocompound metabolism                              | 1 | 8  | 0.366781163 |
| Porphyrin and chlorophyll metabolism                   | 1 | 14 | 0.376880844 |
| Butanoate metabolism                                   | 1 | 14 | 0.376880844 |
| Terpenoid backbone                                     | 1 | 14 | 0.376880844 |

|                                             |   |    |             |
|---------------------------------------------|---|----|-------------|
| <hr/>                                       |   |    |             |
| biosynthesis                                |   |    |             |
| Biosynthesis of unsaturated fatty acids     | 1 | 9  | 0.377666438 |
| Sulfur metabolism                           | 1 | 13 | 0.382515276 |
| Riboflavin metabolism                       | 1 | 10 | 0.384042432 |
| <b>Cellular Processes</b>                   |   |    |             |
| Peroxisome                                  | 7 | 30 | 0.007807138 |
| Autophagy                                   | 1 | 33 | 0.161340442 |
| Phagosome                                   | 1 | 27 | 0.226971283 |
| <b>Genetic Information Processing</b>       |   |    |             |
| Spliceosome                                 | 1 | 48 | 0.059723004 |
| Protein processing in endoplasmic reticulum | 3 | 50 | 0.18634104  |
| Aminoacyl-tRNA biosynthesis                 | 1 | 28 | 0.215093738 |
| RNA degradation                             | 3 | 28 | 0.221251643 |
| Ribosome biogenesis in eukaryotes           | 1 | 26 | 0.239155944 |
| Sulfur relay system                         | 1 | 4  | 0.261112564 |
| Ubiquitin mediated proteolysis              | 1 | 17 | 0.350284875 |
| <b>Environmental Information Processing</b> |   |    |             |
| MAPK signalling pathway                     | 3 | 28 | 0.221251643 |
| <hr/>                                       |   |    |             |
